# Supplementary material for: PrimeDesign software for rapid and simplified design of prime editing guide RNAs
Source: Research Square preprint supplement (doi:10.21203/rs.3.rs-111349/v1), 2020-11-30
Supplement: Supplementary file 3 [file 27d3104affbd234f6a920985.xlsx]

## Sheet: Sheet1
Supplementary Table 2: Sequences of pegRNAs, nicking sgRNAs, primers, and amplicons used
Target gene & edit	pegRNA spacer sequence	PAM	3' extension #1	3' extension #2	Primer binding sequence	RT template #1	RT template #2	nicking gRNA #1 spacer	nicking gRNA #2 spacer	FWD primer PCR1	REV primer PCR1	Amplicon sequence	ClinVar ID	PrimeDesign Input
TNNT2 - delGAG	GAGGGCTCGACGAGAGGAGG	AGG	AGCCTTCCTCCTGTTCTCCTCCTCTCGTCGAG		CCTCTCGTCGAG	AGCCTTCCTCCTGTTCTCCT		GAGGATTGGAAACCCTGATTC		ACACTCTTTCCCTACACGACGCTCTTCCGATCTCCTGCTGCTCCCTACCTACCTTC	GACTGGAGTTCAGACGTGTGCTCTTCCGATCTGCTTCAGCCCAGAATCAGGGTTTC	GCTTCAGCCCAGAATCAGGGTTTCCAATCCTTTCCCCTAATTTGCTTTCTTCCTCCCTGCTGTAAATCAGGAAGAGAGGGCTCGACGAGAGGAGGAGGAGAACAGGAGGAAGGCTGAGGATGAGGCCCGGAAGAAGAAGGCTTTGTCCAACATGATGCATTTTGGGGGTTACATCCAGAAGGTAGGTAGGGAGCAGCAGG	43648	AGCACTGTGCTGGGAGCTACCCTCTCAGAAAGCTCCTTGCTGAGCGGAGAGAAAGCTGAACTCACCCATAAAGACCACAAGCTTCAGCCCAGAATCAGGGTTTCCAATCCTTTCCCCTAATTTGCTTTCTTCCTCCCTGCTGTAAATCAGGAAGAGAGGGCTCGACGAGAGGAGGAG(-GAG)AACAGGAGGAAGGCTGAGGATGAGGCCCGGAAGAAGAAGGCTTTGTCCAACATGATGCATTTTGGGGGTTACATCCAGAAGGTAGGTAGGGAGCAGCAGGGGTTGCCAGGAGATCCTAGTATAGCCCTGAGGAATGAGGTGTCCACTGCA
MYBPC3 - 25bp del	GAAATAAGGTAAAGAGAGGGA	AGG	AACACAGATGTGTCTCCCTGGGTCCCTGCCAGGTCCCCTCTCTTTACCTTAT		CTCTCTTTACCTTAT	AACACAGATGTGTCTCCCTGGGTCCCTGCCAGGTCCC		GCATAGTCAGGGACTCTCGT		ACACTCTTTCCCTACACGACGCTCTTCCGATCTTGCTGAACATGCGGAAGCGG	GACTGGAGTTCAGACGTGTGCTCTTCCGATCTTTTCCAGCCTTGGGCATAGTCAGG	TGCTGAACATGCGGAAGCGGGCGTCTTCTCCCAGGTCCAGGCCATTCTTGAACCAGGAAATCTTGGGCTATAAATAAGGTAAAGAGAGGGAGGGAAGCCATCCAGGCTGAGAGGGGACCTGGCAGGGACCCAGGGAGACACATCTGTGTTTCTACTCGGGGGGTCCCACGAGAGTCCCTGACTATGCCCAAGGCTGGAAA	177677	CATAGATGCCCCCGTCAAAGGGGCAGGGCTTTCTAATCTCCAGAGTCAACACTCCCTGCTTGCTGAACATGCGGAAGCGGGCGTCTTCTCCCAGGTCCAGGCCATTCTTGAACCAGGAAATCTTGGGCTATAAATAAGGTAAAGAGAGGG(-AGGGAAGCCATCCAGGCTGAGAGGG)GACCTGGCAGGGACCCAGGGAGACACATCTGTGTTTCTACTCGGGGGGTCCCACGAGAGTCCCTGACTATGCCCAAGGCTGGAAACAAACATGGAACCAAGAGTGAGTACCATGGCCCTGCCCAGGGGGAGGAACCCGGTCCATACACCC
MC4R - delCTCT	GCCTGGCCATCAGGAACATG	TGG	GCTCTCATGGCTTCTATGTCCACATGTTCCTGATGGC		GTTCCTGATGGC	GCTCTCATGGCTTCTATGTCCACAT		GCCGCCAAGGTGCCAATATGA		ACACTCTTTCCCTACACGACGCTCTTCCGATCTAATCAGGATGGTCAAGGTAATCGCTCC	GACTGGAGTTCAGACGTGTGCTCTTCCGATCTTCATTTACTCAGATAGTAGTGCTGTCATCATCTG	AATCAGGATGGTCAAGGTAATCGCTCCCTTCATATTGGCACCTTGGCGGATGGCACCAGTGCCGGGGAGGACAGCAATCCTCTTAATGTGAAGCCTGGCCATCAGGAACATGTGGACATAGAGAGAAGCCATGAGAGCCAGCATGGTGAAGAACATGGTGATGAGGCAGATGATGACAGCACTACTATCTGAGTAAATGA	14316	TACCATAACATTATGACAGTTAAGCGGGTTGGGATCATCATAAGTTGTATCTGGGCAGCTTGCACGGTTTCAGGCATTTTGTTCATCATTTACTCAGATAGTAGTGCTGTCATCATCTGCCTCATCACCATGTTCTTCACCATGCTGGCTCTCATGGCTTCT(-CTCT)ATGTCCACATGTTCCTGATGGCCAGGCTTCACATTAAGAGGATTGCTGTCCTCCCCGGCACTGGTGCCATCCGCCAAGGTGCCAATATGAAGGGAGCGATTACCTTGACCATCCTGATTGGCGTCTTTGTTGTCTGCTGGGCCCCATTCT
SCN5A - delG4CTTCT	GGCCGTGGGATGGGCTTCTG	GGG	GCCATGAAGAAGCTGGGCTCCAAGAAGCCCATCC		AAGCCCATCC	GCCATGAAGAAGCTGGGCTCCAAG		GCTCCAAGAAGCCCATCCCA		ACACTCTTTCCCTACACGACGCTCTTCCGATCTGGCTGGCCATGTGGCACG	GACTGGAGTTCAGACGTGTGCTCTTCCGATCTTGCCTTCTCTTTGCACTTAGGGGG	GGCTGGCCATGTGGCACGAAAGCTTCCCAGGGACCCCAGAAGATCCTCCCCACTCCCACAAAACCAGGAGCCTGGCTCACCAGGGGCCGTGGGATGGGCTTCTGGGGCTTCTTGGAGCCCAGCTTCTTCATGGCATTGTAGTACTTCTTCTGCTCCTCTGTCATGAAGATGTCCTGGCCCCCTAAGTGCAAAGAGAAGGCA	201571	TGCCCTCCATGCTGGGGCCTCTGAGAACCCCAGAATGAGGTTGGTGCCTTCTCTTTGCACTTAGGGGGCCAGGACATCTTCATGACAGAGGAGCAGAAGAAGTACTACAATGCCATGAAGAAGCTGGGCTCCA(-AGAAGCCCC)AGAAGCCCATCCCACGGCCCCTGGTGAGCCAGGCTCCTGGTTTTGTGGGAGTGGGGAGGATCTTCTGGGGTCCCTGGGAAGCTTTCGTGCCACATGGCCAGCCATCAGAGCCGCTTCACAGTCTTTCAGCCCAGCCTGAGGGGCACTATC
TTR - delGTC	GAGTCCCTCATTCCTTGGGAT	TGG	TCCACCACGGCTGTCACCAATCCCAAGGAATGAGGGA	TCCACCACGGCTGTCACAAATCCCAAGGAATGAGGGA	CCAAGGAATGAGGGA	TCCACCACGGCTGTCACCAATC	TCCACCACGGCTGTCACAAATC	GCACGGCTGTCACCAATCCCA	GTATTCACAGCCAACGACTC	ACACTCTTTCCCTACACGACGCTCTTCCGATCTTTCACAGCCAACGACTCCGGC	GACTGGAGTTCAGACGTGTGCTCTTCCGATCTGCATATGAGGTGAAAACACTGCTTTAGTAAAAATGG	GCATATGAGGTGAAAACACTGCTTTAGTAAAAATGGAATACTCTTGGTTACATGAAATCCCATCCCTCGTCCTTCAGGTCCACTGGAGGAGAAGTCCCTCATTCCTTGGGATTGGTGACGACAGCCGTGGTGGAATAGGAGTAGGGGCTCAGCAGGGCGGCAATGGTGTAGCGGCGGGGGCCGGAGTCGTTGGCTGTGAA	13460	GGAAATGGATCTGTCTGTCTTCTCTCATAGGTGGTATTCACAGCCAACGACTCCGGCCCCCGCCGCTACACCATTGCCGCCCTGCTGAGCCCCTACTCCTATTCCACCACGGCTGTC(-GTC)ACCAATCCCAAGGAATGAGGGACTTCTCCTCCAGTGGACCTGAAGGACGAGGGATGGGATTTCATGTAACCAAGAGTATTCCATTTTTACTAAAGCAGTGTTTTCACCTCATATGCTATGTTAGAAGTCCAGGCAGAGACAATAAAACAT
CFH - 24bp del	GAACATGTTGGGATGGGAAAC	TGG	ACTAAAGTTCTGAATAAAGGTGTGCACTTTATGATTGATACTCCAGTTTCCCATCCC	ACTAAAGTTCTGAATAAAGGTGTGCACTTTATGATTGATACTCGAGTTTCCCATCCC	TCCCATCCC	ACTAAAGTTCTGAATAAAGGTGTGCACTTTATGATTGATACTCCAGTT	ACTAAAGTTCTGAATAAAGGTGTGCACTTTATGATTGATACTCGAGTT	GAATACTAAAGTTCTGAATAA		ACACTCTTTCCCTACACGACGCTCTTCCGATCTGTGTGTAAACGGGGATATCGTCTTTCATCA	GACTGGAGTTCAGACGTGTGCTCTTCCGATCTGCCACCGGTCTCAGCTTATAATTACATTTTC	GTGTGTAAACGGGGATATCGTCTTTCATCACGTTCTCACACATTGCGAACAACATGTTGGGATGGGAAACTGGAGTATCCAACTTGTGCAAAAAGATAGAATCAATCATAAAGTGCACACCTTTATTCAGAACTTTAGTATTAAATCAGTTCTCAATTTCATTTTTTATGTATTGTTTTACTCCTTTTTATTCATACGTAAAATTTTGGATTAATTTGTGAAAATGTAATTATAAGCTGAGACCGGTGGC	16546	CCGTGTGTAATATCCCGAGAAATTATGGAAAATTATAACATAGCATTAAGGTGGACAGCCAAACAGAAGCTTTATTCGAGAACAGGTGAATCAGTTGAATTTGTGTGTAAACGGGGATATCGTCTTTCATCACGTTCTCACACATTGCGAACAACATGTTGGGATGGGAAACTGGAGTATC(-CAACTTGTGCAAAAAGATAGAATC)AATCATAAAGTGCACACCTTTATTCAGAACTTTAGTATTAAATCAGTTCTCAATTTCATTTTTTATGTATTGTTTTACTCCTTTTTATTCATACGTAAAATTTTGGATTAATTTGTGAAAATGTAATTATAAGCTGAGACCGGTGGCTCT
GATA2 - delTGT	GTTTCGGCGCCATAAGGTGG	TGG	GCAAATTGTCAGACGACCACCACCTTATGGCGCC	GCAAATTGTCAGACGACAACCACCTTATGGCGCC	CCTTATGGCGCC	GCAAATTGTCAGACGACCACCA	GCAAATTGTCAGACGACAACCA	GTCAGACGACCACCACCTTA	GCGCTGCCTTGCCCTCCCAGT	ACACTCTTTCCCTACACGACGCTCTTCCGATCTAGGTCCCCTGGGAGGGGC	GACTGGAGTTCAGACGTGTGCTCTTCCGATCTAGCCTGCTGACGCTGCCTT	AGGTCCCCTGGGAGGGGCGGGGTGGCCGGGGCGGGGCGCACTCACATTGTGCAGCTTGTAGTAGAGGCCACAGGCGTTGCAGACAGGGTCCCCGTTGGCGTTTCGGCGCCATAAGGTGGTGGTTGTCGTCTGACAATTTGCACAACAGGTGCCGGCTCTTCTGGCGGCCGACTGGGAGGGCAAGGCAGCGTCAGCAGGCT	29722	GGGAGGGGGGTCGAGGTGGGCGTGGGAGTCCAGCCTGCTGACGCTGCCTTGCCCTCCCAGTCGGCCGCCAGAAGAGCCGGCACCTGTTGTGCAAATTGTCAGACG(-ACA)ACCACCACCTTATGGCGCCGAAACGCCAACGGGGACCCTGTCTGCAACGCCTGTGGCCTCTACTACAAGCTGCACAATGTGAGTGCGCCCCGCCCCGGCCACCCCGCCCCTCCCAGGGGACCTCTGCGCTTTGTGCTGCCAGGCAAGAGG
GLA - del(CAGC)2CCATG	GATTGGCAAGGACGCCTACCA	TGG	GGTTGCACATGAAGCGCTCCCAGTGGTAGGCGTCCTTG		TAGGCGTCCTTG	GGTTGCACATGAAGCGCTCCCAGTGG		GCATGAAGCGCTCCCAGTGGT	GCAATATCTGATACCTGATGC	ACACTCTTTCCCTACACGACGCTCTTCCGATCTAAACACATGGAAAAGCAAAGGGAAGGG	GACTGGAGTTCAGACGTGTGCTCTTCCGATCTTTGCGCTTCGCTTCCTGGC	TTGCGCTTCGCTTCCTGGCCCTCGTTTCCTGGGACATCCCTGGGGCTAGAGCACTGGACAATGGATTGGCAAGGACGCCTACCATGGGCTGGCTGCACTGGGAGCGCTTCATGTGCAACCTTGACTGCCAGGAAGAGCCAGATTCCTGCATCAGGTATCAGATATTGGGTACTCCCTTCCCTTTGCTTTTCCATGTGTTT	10749	ATGCAGCTGAGGAACCCAGAACTACATCTGGGCTGCGCGCTTGCGCTTCGCTTCCTGGCCCTCGTTTCCTGGGACATCCCTGGGGCTAGAGCACTGGACAATGGATTGGCAAGGACGCCTAC(-CATGGGCTGGCTG)CACTGGGAGCGCTTCATGTGCAACCTTGACTGCCAGGAAGAGCCAGATTCCTGCATCAGGTATCAGATATTGGGTACTCCCTTCCCTTTGCTTTTCCATGTGTTTGGGTGTGTTTGGGGAACTGGAGAGTCTCAACGGGAACAGTTGAGC
PTCH1 - insTCTAC	GAGGTGTCCCGCAAGCCGTTG	AGG	GCCCAGTTCCCTTTCTACGTAGACTCAACGGCTTGCGG		CGGCTTGCGG	GCCCAGTTCCCTTTCTACGTAGACTCAA		GCCCTTTCTACgtagaCTCAA	GCTGTGATGCTCTTCTACCCT	ACACTCTTTCCCTACACGACGCTCTTCCGATCTGCCCCAGGCTCGTATAGTTGCT	GACTGGAGTTCAGACGTGTGCTCTTCCGATCTCTCTCTTTCCATTGAAACTGTGATGCTCTTC	GCCCCAGGCTCGTATAGTTGCTGCAGATGGTCCTTACTTTTTCAATTGCCTCCACAAAGTCTGAGGTGTCCCGCAAGCCGTTGAGGTAGAAAGGGAACTGGGCATACTCGATGGGCTCTGCTGCCGGGACTGGACAGAGAAGGGCACAGGTTAGGAGCAGCCCAGGGTAGAAGAGCATCACAGTTTCAATGGAAAGAGAG	453836	TTTCATGCAAAGTTCTTCTCTCTTTCCATTGAAACTGTGATGCTCTTCTACCCTGGGCTGCTCCTAACCTGTGCCCTTCTCTGTCCAGTCCCGGCAGCAGAGCCCATCGAGTATGCCCAGTTCCCTTTCTAC(+GTAGA)CTCAACGGCTTGCGGGACACCTCAGACTTTGTGGAGGCAATTGAAAAAGTAAGGACCATCTGCAGCAACTATACGAGCCTGGGGCTGTCCAGTTACCCCAACGGCTACCCCTTCCTCTTCTGGGAGCAGTACATCGGCCTCCGCCACTGG
HMBS - dup	GCCCTACCAGGTGCCTCAGGA	AGG	TGCTGCACGATCCCGAGACTTTCGCTGCATCGCTGAAAGGGCCTTCCTGAGGCACCTGG		TGAGGCACCTGG	TGCTGCACGATCCCGAGACTTTCGCTGCATCGCTGAAAGGGCCTTCC		GACTttcgctgcATCGCTGAA		ACACTCTTTCCCTACACGACGCTCTTCCGATCTTGATGTCCTAGGATGTTTTTCCATCAGGG	GACTGGAGTTCAGACGTGTGCTCTTCCGATCTCTTTCCCAGCTCTCCAAGTCCCC	CTTTCCCAGCTCTCCAAGTCCCCAGCCCTCCACAGGTGGAGCACAGGCCCTACCAGGTGCCTCAGGAAGGCCCTTTCAGCGATGCAGCGAAGCAGAGTCTCGGGATCGTGCAGCACACCCACCAGATCCAAGATGTCCTGGTCCTTGGCTCGCACTTCCACGCCCAAGGCCCCCTGATGGAAAAACATCCTAGGACATCA	1470	TGGGGAGCAAGTAGATAGAGGTGGTCCCATGCTTTGCGCCATTGGTTGGGGAAAGATCAGGCCTGATGTCCTAGGATGTTTTTCCATCAGGGGGCCTTGGGCGTGGAAGTGCGAGCCAAGGACCAGGACATCTTGGATCTGGTGGGTGTGCTGCACGATCCCGAGACT(+TTCGCTGC)ATCGCTGAAAGGGCCTTCCTGAGGCACCTGGTAGGGCCTGTGCTCCACCTGTGGAGGGCTGGGGACTTGGAGAGCTGGGAAAGGTGGCAGGGAAGATTTCTTACATGAATGCTCTGTATACAGTGCTAACTCATTCTTGTTGAATGTTGT
PKD1 - indel	GCCCAGAGCTGGGGCCCCCA	CGG	GCCCTGCCAGCTCACCTTCCTGCAGCCGTGGGGGCCCCA	GCCCTGCCAGCTCACCTTCCTGCAGTCTTGGGGGCCCCA	GGGCCCCA	GCCCTGCCAGCTCACCTTCCTGCAGCCGTGG	GCCCTGCCAGCTCACCTTCCTGCAGTCTTGG	GAGCTCACCTTCCTGCAGCCG		ACACTCTTTCCCTACACGACGCTCTTCCGATCTTCCGCTAAAGGCTGCTCTCTCAAC	GACTGGAGTTCAGACGTGTGCTCTTCCGATCTTGTGACTGATGCTGTGGCAGGT	TGTGACTGATGCTGTGGCAGGTCTGAGGAGCTCTGGCCATGGATGGCCCACGTGCTGCTGCCCTACGTCCACGGGAACCAGTCCAGCCCAGAGCTGGGGCCCCCACGGCTGCGGCAGGTGCGGCTGCAGGAAGGTGAGCTGGCAGGGCGTGCCCCAAGACTTAAATCGTTCCTCTTGTTGAGAGAGCAGCCTTTAGCGGA	8197	CTCACTCGAGGCGGGCATGGGGCAGTAGGGGCTGGAGCGTGTGACTGATGCTGTGGCAGGTCTGAGGAGCTCTGGCCATGGATGGCCCACGTGCTGCTGCCCTACGTCCACGGGAACCAGTCCAGCCCAGAGCTGGGGCCCCCA(-CGGCTGCGGCAGGTG)CGGCTGCAGGAAGGTGAGCTGGCAGGGCGTGCCCCAAGACTTAAATCGTTCCTCTTGTTGAGAGAGCAGCCTTTAGCGGAGCTCTGGCATCAGCCCTGCTCCCTAGCTGTGTGACCTTTGCCCTCTTAACACCGCCGTTTCCTTCTCTGT
SERPINA1 - delAG	GCCTCCTCTGTGACCCCGGAG	AGG	GCAATGGGGCTGACCTCCGGGGTCACAGA		CGGGGTCACAGA	GCAATGGGGCTGACCTC		GTCAGCAATGGGGCTGACCTC		ACACTCTTTCCCTACACGACGCTCTTCCGATCTCCCCACACATTCTTCCCTACAGATACC	GACTGGAGTTCAGACGTGTGCTCTTCCGATCTAGCTTACATTTACCCAAACTGTCCATTACTGG	CCCCACACATTCTTCCCTACAGATACCAGGGTGCAACAAGGTCGTCAGGGTGATCTCACCTTGGAGAGCTTCAGGGGTGCCTCCTCTGTGACCCCGGAGAGGTCAGCCCCATTGCTGAAGACCTTAGTGATGCCCAGTTGACCCAGGACGCTCTTCAGATCATAGGTTCCAGTAATGGACAGTTTGGGTAAATGTAAGCT	17980	GTCCCAGAAGAACAAGAGGAATGCTGTGCCATGCCTTGAATTTCTTTTCTGCACGACAGGTCTGCCAGCTTACATTTACCCAAACTGTCCATTACTGGAACCTATGATCTGAAGAGCGTCCTGGGTCAACTGGGCATCACTAAGGTCTTCAGCAATGGGGCTGACCT(-CT)CCGGGGTCACAGAGGAGGCACCCCTGAAGCTCTCCAAGGTGAGATCACCCTGACGACCTTGTTGCACCCTGGTATCTGTAGGGAAGAATGTGTGGGGGCTGCAGCTCTGTCCTGAGGCTGAGGAAGGGGCCGAGGGAAACAAATGAAGAC
PAH - delATG	GTATGAATTTTTCACCCATT	TGG	GCCTCAAGATCTTGATGTTTGTCAGAGCAGGCAGGCTACGTTTATCCAAATGGGTGAAAAATTCATA		GGGTGAAAAATTCATA	GCCTCAAGATCTTGATGTTTGTCAGAGCAGGCAGGCTACGTTTATCCAAAT		GATCTTGATGTTTGTCAGAGC		ACACTCTTTCCCTACACGACGCTCTTCCGATCTTCTAATTCTTACCTGTGTCTTTCTTCTTATCTCGTG	GACTGGAGTTCAGACGTGTGCTCTTCCGATCTCTAGGAGAATGATGTAAACCTGACCCACATT	CTAGGAGAATGATGTAAACCTGACCCACATTGAATCTAGACCTTCTCGTTTAAAGAAAGATGAGTATGAATTTTTCACCCATTTGGATAAACGTAGCCTGCCTGCTCTGACAAACATCATCAAGATCTTGAGGCATGACATTGGTGCCACTGTCCATGAGCTTTCACGAGATAAGAAGAAAGACACAGGTAAGAATTAGA	604	ATCTTTGGCCTGCGTTAGTTCCAGTGACTGTCTCCTCACCCTCCCCATTCTCTCTTCTAGGAGAATGATGTAAACCTGACCCACATTGAATCTAGACCTTCTCGTTTAAAGAAAGATGAGTATGAATTTTTCACCCATTTGGATAAACGTAGCCTGCCTGCTCTGACAAA(-CAT)CATCAAGATCTTGAGGCATGACATTGGTGCCACTGTCCATGAGCTTTCACGAGATAAGAAGAAAGACACAGGTAAGAATTAGAGGAATTTTGCAACATAAGTAACTCCACACTGTCTTCATAAAATAACAGCAATATACATATTTAACAG
F8 - delG	GGTGACTCACCATGCCCGGG	GGG	GCCTCTGCCCCCGGGCATGGTGAG		GGGCATGGTGAG	GCCTCTGCCCCC		GTCTCTGGCTGCCTCTGCCCC	GCTGACAACCTGCGGGCTGAA	ACACTCTTTCCCTACACGACGCTCTTCCGATCTCCCTTGTTTCTTCCTCTCTCTGGCTG	GACTGGAGTTCAGACGTGTGCTCTTCCGATCTTGCGGGCTGAAGGGCTCG	CCCTTGTTTCTTCCTCTCTCTGGCTGCACAGCCCCCTCACTCATCCCTGCCTACAAGAAAACTGAAGGGCAGGCACCAGCTCTGTGCCTGGTGACTCACCATGCCCGGGGGGCAGAGGCAGCCAGAGACACAGCCCATGCTCATGCACTCCAGGTCATAGTTCTGGCACGTTTTGGTACACTCGAGCCCTTCAGCCCGCA	303	AAAAGGAGCCTATCCTGTCGGCCCCCCATGGTCAAGCTGGTGTGTCCCGCTGACAACCTGCGGGCTGAAGGGCTCGAGTGTACCAAAACGTGCCAGAACTATGACCTGGAGTGCATGAGCATGGGCTGTGTCTCTGGCTGCCTCTGCCCCC(-C)GGGCATGGTGAGTCACCAGGCACAGAGCTGGTGCCTGCCCTTCAGTTTTCTTGTAGGCAGGGATGAGTGAGGGGGCTGTGCAGCCAGAGAGAGGAAGAAACAAGGGCTAAACACGGATAGCAATGGAGGTGGTGCTGGTAATGGGGGCAT
DMD - delG	GACTACGAGGCTGGCTCAGGG	GGG	GGACTCCCCCTGAGCCAGCC		TGAGCCAGCC	GGACTCCCCC		GAGAATCCTAGCAGATCTTG		ACACTCTTTCCCTACACGACGCTCTTCCGATCTTTTCTTCCTCAAGATCTGCTAGGATTCTCTCT	GACTGGAGTTCAGACGTGTGCTCTTCCGATCTAAATAAGGGGGGGAAAAAACCAAAACCTTT	TTTCTTCCTCAAGATCTGCTAGGATTCTCTCTAGCTCCCCTCTTTCCTCACTCTCTAAGGAAATCAAGATCTGGGCAGGACTACGAGGCTGGCTCAGGGGGGAGTCCTGGTTCAAACTTTGGCAGTAATGCTGGATTAACAAATGTTCATCATCTCTGGAAAATAAAATCAAAGGTTTTGGTTTTTTCCCCCCCTTATTT	497301	TTTCTATTTTCAAATACACTCCTGAGTCCCTAACCCCCAAAGCAAAATAAGGGGGGGAAAAAACCAAAACCTTTGATTTTATTTTCCAGAGATGATGAACATTTGTTAATCCAGCATTACTGCCAAAGTTTGAACCAGGACTCCCCC(-C)TGAGCCAGCCTCGTAGTCCTGCCCAGATCTTGATTTCCTTAGAGAGTGAGGAAAGAGGGGAGCTAGAGAGAATCCTAGCAGATCTTGAGGAAGAAAACAGGTGAGTTTTCTTTCTAGCTTTGTCATTGGTATGCAGAGTGCATACACTTG
PSEN1 - C>T	GAAAGAGCATGATCACATGCT	TGG	AAATATGGCGTCAAGCATGTGATCATGCTCT		ATGTGATCATGCTCT	AAATATGGCGTCAAGC		GTTATCTAATGGACGACCCCA		ACACTCTTTCCCTACACGACGCTCTTCCGATCTCCATTATCTAATGGACGACCCCAGGG	GACTGGAGTTCAGACGTGTGCTCTTCCGATCTACGTACAGCTGCCCATCCTTCC	ACGTACAGCTGCCCATCCTTCCGGGTATAAAAGCTGACTGACTTAATGGTAGCCACGACCACCACCATGCAGAGAGTCACAGGGACAAAGAGCATGATCACATGCTTGGCGCCATATTTCAATGTCAGCTCCTCATCTTCTTCCTCATCTTGCTCCACCACCTGCCGGGAGTTACCCTGGGGTCGTCCATTAGATAATGG	18157	AATGACAATAGAGAACGGCAGGAGCACAACGACAGACGGAGCCTTGGCCACCCTGAGCCATTATCTAATGGACGACCCCAGGGTAACTCCCGGCAGGTGGTGGAGCAAGATGAGGAAGAAGATGAGGAGCTGACATTGAAATATGGCG(C/T)CAAGCATGTGATCATGCTCTTTGTCCCTGTGACTCTCTGCATGGTGGTGGTCGTGGCTACCATTAAGTCAGTCAGCTTTTATACCCGGAAGGATGGGCAGCTGTACGTATGAGTTTTGTTTTATTATTCTCAAAGCCAGTGTGGCTTTTC
IDUA - G>A	GCCGCAGATGAGGAGCAGCTC	TGG	ACACTTCGGCCTAGAGCTGCTCCTCATC		CTGCTCCTCATC	ACACTTCGGCCTAGAG		GtAGAGCTGCTCCTCATCTGC	GGCCGGGCCCTGGGGGCGGT	ACACTCTTTCCCTACACGACGCTCTTCCGATCTACTCCTTCACCAAGGGGAGGGG	GACTGGAGTTCAGACGTGTGCTCTTCCGATCTGGGGCGGTGGGCGCT	ACTCCTTCACCAAGGGGAGGGGGAGCGAGTGGTGGGAGGCCCGGCCCTGGGTCGGGGGGCGGCTGGGCAACGACCCCACGCGGCGACGGCCCCCCCCCGCCCCGCAGATGAGGAGCAGCTCTGGGCCGAAGTGTCGCAGGCCGGGACCGTCCTGGACAGCAACCACACGGTGGGCGTCCTGGCCAGCGCCCACCGCCCC	11908	CGCGCTTCCCGGGGTCGGCCTCCGCGTGGCGGGGCCTGGGGACTCCTTCACCAAGGGGAGGGGGAGCGAGTGGTGGGAGGCCCGGCCCTGGGTCGGGGGGCGGCTGGGCAACGACCCCACGCGGCGACGGCCCCCCCCCGCCCCGCAGATGAGGAGCAGCTCT(G/A)GGCCGAAGTGTCGCAGGCCGGGACCGTCCTGGACAGCAACCACACGGTGGGCGTCCTGGCCAGCGCCCACCGCCCCCAGGGCCCGGCCGACGCCTGGCGCGCCGCGGTGCTGATCTACGCGAGCGACGACACCCGCGCCCACCCCAACCG
IDS - G>A	GACTGAGGGATGTCTGAAGGC	CGG	GCCAGTATCCCTGGCCTTCAGACATCCCT		TTCAGACATCCCT	GCCAGTATCCCTGGCC		GCATTTTCGATTCCGTGACT		ACACTCTTTCCCTACACGACGCTCTTCCGATCTTGAAGCCAACCCACACAGTATACCTATAGT	GACTGGAGTTCAGACGTGTGCTCTTCCGATCTGAAGCATTTTCGATTCCGTGACTTGGAAG	TGAAGCCAACCCACACAGTATACCTATAGTCTATGGTGCGTATGGAATAGCCCATGATCTTTATATCTTTTAAACTCGGCTTGTCAGAATTCCACTGAGGGATGTCTGAAGGCCGGGGATACTGGCTATAGGCAATCAGTTCACGGGGATTACCAGGGAGGTACGGATCCTCTTCCAAGTCACGGAATCGAAAATGCTTC	10497	GGACTGCAGGTTCCACCTCGCTGCCCCGTTCCTTCATTTCACGTTGAGCTGTGCAGAGAAGGCAAGAACCTTCTGAAGCATTTTCGATTCCGTGACTTGGAAGAGGATCCGTACCTCCCTGGTAATCCCCGTGAACTGATTGCCTATAGCCAGTATCCC(C/T)GGCCTTCAGACATCCCTCAGTGGAATTCTGACAAGCCGAGTTTAAAAGATATAAAGATCATGGGCTATTCCATACGCACCATAGACTATAGGTATACTGTGTGGGTTGGCTTCAATCCTGATGAATTTCTAGCTAACTTTTCTGACATCC
ATP7B - delG	GCCAGCAATACCTTTTTCTGC	GGG	GCAGCCTTCCGCAGAAAAAGGTATTGCTG		GAAAAAGGTATTGCTG	GCAGCCTTCCGCA		GTCCGCAGAAAAAGGTATTGC		ACACTCTTTCCCTACACGACGCTCTTCCGATCTGAGGCAATCACTGCTGGGCG	GACTGGAGTTCAGACGTGTGCTCTTCCGATCTGTGGAATTGGGTGCAAAGTCAGCAA	GAGGCAATCACTGCTGGGCGTGGTGCTCTCTGTGGTTTGACCCACCTCTACTTTTAACCAGCTGCAGAGACAAAAGCCAGCAATACCTTTTTCTGCGGGAAGGCTGCCAGCCTCATTCAGGTGACTGGCCGGTGCACTCAAAGGGCGCTCACTGTGGGCCAGGATGCCTTCCACGTTGCTGACTTTGCACCCAATTCCAC	88958	GAACTTGGAACAGAGACCTTGGGATACTGCACGGACTTCCAGGCAGTGCCAGGCTGTGGAATTGGGTGCAAAGTCAGCAACGTGGAAGGCATCCTGGCCCACAGTGAGCGCCCTTTGAGTGCACCGGCCAGTCACCTGAATGAGGCTGGCAGCCTTCC(-C)GCAGAAAAAGGTATTGCTGGCTTTTGTCTCTGCAGCTGGTTAAAAGTAGAGGTGGGTCAAACCACAGAGAGCACCACGCCCAGCAGTGATTGCCTCTGCTGTGCGGCAGACGGTTCATGGCTAAGGCACCCAAGCCTGCCTCCCCACACC
LDLR - T>A	GCGCGGCGGGGACTGCAGGTA	AGG	AGCAAGCCTTTCCTGCAGTCCC		CTGCAGTCCC	AGCAAGCCTTTC		GCTTTCCTGCAGTCCCCGCCG	GCCATGCTCGCAGCCTCTGCC	ACACTCTTTCCCTACACGACGCTCTTCCGATCTTGGCAGAGGCTGCGAGCA	GACTGGAGTTCAGACGTGTGCTCTTCCGATCTATTACCCCACAAGTCTCCCAGGGA	TGGCAGAGGCTGCGAGCATGGGGCCCTGGGGCTGGAAATTGCGCTGGACCGTCGCCTTGCTCCTCGCCGCGGCGGGGACTGCAGGTAAGGCTTGCTCCAGGCGCCAGAATAGGTTGAGAGGGAGCCCCCGGGGGGCCCTTGGGAATTTATTTTTTTGGGTACAAATAATCACTCCATCCCTGGGAGACTTGTGGGGTAAT	250987	CCGAGTGCAATCGCGGGAAGCCAGGGTTTCCAGCTAGGACACAGCAGGTCGTGATCCGGGTCGGGACACTGCCTGGCAGAGGCTGCGAGCATGGGGCCCTGGGGCTGGAAATTGCGCTGGACCGTCGCCTTGCTCCTCGCCGCGGCGGGGACTGCAGG(T/A)AAGGCTTGCTCCAGGCGCCAGAATAGGTTGAGAGGGAGCCCCCGGGGGGCCCTTGGGAATTTATTTTTTTGGGTACAAATAATCACTCCATCCCTGGGAGACTTGTGGGGTAATGGCACGGGGTCCTTCCCAAACGGCTGGAGGGGGCGC
